# Supplementary material
Source: PubMed Central journal article supplement (PMC2578827)
Supplement: NIHMS64799-supplement-01.pdf [file NIHMS64799-supplement-01.pdf]

## Supplemental Data

### Cell Metabolism, *Volume 8*

#### Genome-wide Coactivation Analysis of PGC-1 $\alpha$ Identifies BAF60a as a Regulator of Hepatic Lipid Metabolism

Siming Li, Chang Liu, Na Li, Tong Hao, Ting Han, David E. Hill, Marc Vidal, Jiandie D. Lin

#### Supplemental Tables

**Table S2. Transcription Factor and Cofactor Families in the Human Genome and TFORC.**

| Category            | hTF  | TFORC | Coverage |
|---------------------|------|-------|----------|
| b-ZIP               | 51   | 31    | 60.8%    |
| HLH                 | 103  | 47    | 45.6%    |
| HMG-box             | 52   | 26    | 50.0%    |
| Homeobox            | 207  | 72    | 34.8%    |
| Nuclear receptor    | 48   | 30    | 62.5%    |
| Zinc-finger         | 777  | 347   | 44.7%    |
| Other DNA-binding   | 265  | 137   | 51.7%    |
| Basal transcription | 70   | 45    | 64.3%    |
| Cofactor            | 211  | 117   | 55.5%    |
| Others              | 601  | 294   | 48.9%    |
| TOTAL               | 2385 | 1146  | 48.1%    |

**Table S3. List of genes used in clustering analysis.**

---

| <b>Symbol</b> | <b>Pathway</b>                | <b>Gene Name</b>                                                          |
|---------------|-------------------------------|---------------------------------------------------------------------------|
| G6Pase        | Gluconeogenesis               | glucose-6-phosphatase, catalytic                                          |
| PEPCK         | Gluconeogenesis               | phosphoenolpyruvate carboxykinase 1, cytosolic                            |
| Hadha         | Fatty acid $\beta$ -oxidation | mitochondrial trifunctional protein, alpha subunit                        |
| Hadh          | Fatty acid $\beta$ -oxidation | hydroxyacyl-Coenzyme A dehydrogenase                                      |
| Acadm         | Fatty acid $\beta$ -oxidation | acyl-Coenzyme A dehydrogenase, medium chain                               |
| Acadl         | Fatty acid $\beta$ -oxidation | acyl-Coenzyme A dehydrogenase, long chain                                 |
| Acaa2         | Fatty acid $\beta$ -oxidation | mitochondrial 3-oxoacyl-Coenzyme A thiolase                               |
| Etfdh         | Fatty acid $\beta$ -oxidation | electron-transferring-flavoprotein dehydrogenase                          |
| Cpt1a         | Fatty acid $\beta$ -oxidation | carnitine palmitoyltransferase 1A (liver)                                 |
| HMGCS2        | Fatty acid $\beta$ -oxidation | 3-hydroxy-3-methylglutaryl-Coenzyme A synthase 2 (mitochondrial)          |
| Slc25a20      | Fatty acid $\beta$ -oxidation | solute carrier family 25 (carnitine/acylcarnitine translocase), member 20 |
| Ech1          | Fatty acid $\beta$ -oxidation | enoyl Coenzyme A hydratase 1, peroxisomal                                 |
| Acox1         | Fatty acid $\beta$ -oxidation | acyl-Coenzyme A oxidase 1, palmitoyl                                      |
| Alas1         | Heme biosynthesis             | aminolevulinic acid synthase 1                                            |
| Pdk4          | Glucose metabolism            | pyruvate dehydrogenase kinase, isoenzyme 4                                |
| Sod2          | ROS metabolism                | superoxide dismutase 2, mitochondrial                                     |
| Aco2          | Mitochondrial OXPHOS          | aconitase 2, mitochondrial                                                |
| Ndufa2        | Mitochondrial OXPHOS          | NADH dehydrogenase (ubiquinone) 1 alpha subcomplex, 2                     |
| Cox7a1        | Mitochondrial OXPHOS          | cytochrome c oxidase, subunit VIIa 1                                      |
| Cox7b         | Mitochondrial OXPHOS          | cytochrome c oxidase, subunit VIIb                                        |
| Mrpl14        | Mitochondrial OXPHOS          | mitochondrial ribosomal protein L14                                       |
| UCP2          | ROS metabolism                | uncoupling protein 2 (mitochondrial, proton carrier)                      |
| Essra         | Transcriptional regulation    | estrogen-related receptor alpha                                           |
| Ppargc1a      | Transcriptional regulation    | peroxisome proliferative activated receptor, gamma, coactivator 1 alpha   |
| Bmal1         | Circadian clock               | aryl hydrocarbon receptor nuclear translocator-like                       |
| NR1D1         | Circadian clock               | nuclear receptor subfamily 1, group D, member 1                           |
| NR1D2         | Circadian clock               | nuclear receptor subfamily 1, group D, member 2                           |

---

**Table S4. Regulation of fatty acid oxidation genes by PPAR $\alpha$  and BAF60a.**

| Probeset ID  | Gene ID           | Fold Wy14643 | Fold BAF60a | Gene Symbol         |
|--------------|-------------------|--------------|-------------|---------------------|
| 1416409_at   | 11430             | 1.6          | 2.4         | Acox1               |
| 1416772_at   | 12896             | 2.3          | 2.5         | Cpt2                |
| 1416946_a_at | 113868 /// 235674 | 1.7          | 3.7         | Acaa1a /// Acaa1b   |
| 1416947_s_at | 113868 /// 235674 | 1.7          | 3.1         | Acaa1a /// Acaa1b   |
| 1417556_at   | 14080             | 4.2          | 0.9         | Fabp1               |
| 1417956_at   | 12683             | 2.4          | 6.8         | Cidea               |
| 1418321_at   | 13177             | 2.3          | 1.0         | Dci                 |
| 1419365_at   | 18631             | 2.4          | 1.8         | Pex11a              |
| 1419367_at   | 67460             | 2.5          | 2.6         | Decr1               |
| 1419395_at   | 74156             | 2.1          | 1.0         | Acot12              |
| 1422526_at   | 14081             | 5.8          | 2.2         | Acs11               |
| 1422780_at   | 59038             | 2.2          | 1.5         | Pxmp4               |
| 1422996_at   | 171210            | 21.7         | 0.8         | Acot2               |
| 1422997_s_at | 171210 /// 26897  | 35.2         | 5.4         | Acot1 /// Acot2     |
| 1423108_at   | 57279             | 2.3          | 3.5         | Slc25a20            |
| 1423109_s_at | 57279             | 2.6          | 3.7         | Slc25a20            |
| 1423858_a_at | 15360             | 14.5         | 6.6         | Hmgcs2              |
| 1423883_at   | 14081             | 4.0          | 2.4         | Acs11               |
| 1424183_at   | 110446            | 1.7          | 1.2         | Acat1               |
| 1424451_at   | 235674            | 3.7          | 4.7         | Acaa1b              |
| 1425195_a_at | 110460 /// 224530 | 1.0          | 2.4         | Acat2 /// Acot3     |
| 1426522_at   | 231086 /// 623031 | 2.4          | 2.2         | Hadhb /// LOC623031 |
| 1426785_s_at | 23945             | 3.0          | 3.3         | Mgll                |
| 1427052_at   | 100705            | 2.0          | 0.9         | Acacb               |
| 1428145_at   | 52538             | 1.6          | 4.2         | Acaa2               |
| 1428146_s_at | 52538             | 1.4          | 5.3         | Acaa2               |
| 1431012_a_at | 23986             | 2.9          | 3.4         | Peci                |
| 1431833_a_at | 15360             | 3.1          | 2.6         | Hmgcs2              |
| 1433443_a_at | 208715            | 0.9          | 3.4         | Hmgcs1              |
| 1433446_at   | 208715            | 0.9          | 3.4         | Hmgcs1              |
| 1433545_s_at | 102632            | 1.7          | 2.8         | Acad11              |
| 1437172_x_at | 231086            | 2.2          | 1.9         | Hadhb               |
| 1439478_at   | 171210            | 13.6         | 0.8         | Acot2               |
| 1448188_at   | 22228             | 1.8          | 1.3         | Ucp2                |
| 1448382_at   | 74147             | 18.1         | 7.3         | Ehhadh              |
| 1448491_at   | 51798             | 3.3          | 2.1         | Ech1                |
| 1448764_a_at | 14080             | 3.8          | 1.1         | Fabp1               |
| 1448987_at   | 11363             | 1.7          | 2.7         | Acadl               |
| 1449065_at   | 26897             | 99.6         | 1.4         | Acot1               |
| 1449442_at   | 18631             | 2.0          | 1.8         | Pex11a              |
| 1449457_at   | 74156             | 1.7          | 1.0         | Acot12              |
| 1449749_s_at | 224481            | 5.3          | 1.4         | Tfb1m               |
| 1449964_a_at | 56690             | 2.1          | 1.0         | Mlycd               |
| 1450391_a_at | 23945             | 3.1          | 2.9         | Mgll                |
| 1450504_a_at | 28169             | 1.6          | 1.6         | Agpat3              |
| 1450643_s_at | 14081             | 4.6          | 2.4         | Acs11               |
| 1450966_at   | 74114             | 2.2          | 2.1         | Crot                |
| 1451084_at   | 66841             | 2.0          | 2.1         | Etfdh               |
| 1451271_a_at | 110446            | 2.2          | 2.1         | Acat1               |
| 1452173_at   | 97212             | 2.0          | 2.0         | Hadha               |
| 1452260_at   | 14311             | 2.1          | 1.5         | Cidec               |
| 1453836_a_at | 23945             | 4.0          | 3.1         | Mgll                |
| 1454647_at   | 102632            | 1.6          | 2.1         | Acad11              |
| 1455061_a_at | 52538             | 1.5          | 7.0         | Acaa2               |
| 1455438_at   | 59038             | 2.0          | 1.5         | Pxmp4               |
| 1455972_x_at | 15107             | 1.1          | 2.4         | Hadhsc              |
| 1460184_at   | 15107             | 1.4          | 2.1         | Hadhsc              |
| 1460409_at   | 12894             | 2.6          | 2.8         | Cpt1a               |

**Table S5. List of qPCR and ChIP PCR primers.**

|             | <b>Gene</b> | <b>Forward primer</b>   | <b>Reverse primer</b>    |
|-------------|-------------|-------------------------|--------------------------|
| <b>qPCR</b> | Acaa1b      | ATGCTTCCATGCTGAGATTGT   | TCCATCCTTGAAGGCAGGCTT    |
|             | Acaa2       | GATCTCAAGCTGGAAGATAC    | ACCTCTGCTGAGACTGCAAG     |
|             | Acox1       | GCCTGCTGTGTGGGTATGTCATT | GTCATGGGCGGGTGCAT        |
|             | Ech1        | AAGATAAGGACGCCATGCTGAA  | TCCAGGTGGCCATGTAGTCA     |
|             | Ehhadh      | CAGATGAAGCACTCAAGCTTG   | ACCTTGGCAATGGCTTCTGCA    |
|             | Hadha       | TGCTCCTCGACCACGCTAAC    | GCCTTGGTCTTTTTCTGCTT     |
|             | Etfdh       | GGAAGGCGGGAAGAGGATAG    | GCCGTGTGGGTACCTTTGAT     |
|             | Slc25a20    | GTTCAACCACAGGAATCATGAC  | GTGAGCACAGTCCCTTTGTAG    |
|             | Cox7a1      | GTCTCCCAGGCTCTGGTCCG    | CTGTACAGGACGTTGTCCATTC   |
|             | BAF60a      | TGGACCCAAATGACCAGAAAA   | TCTTGTTGTCTAGAGTGGCGATCT |
| <b>ChIP</b> | Acaa1b      | GCACTGATGAGGGCATCTC     | CTAAGCTGGATGCTTGAGTAC    |
|             | Acox1       | TCTAACGTCAGTCAAGTCGG    | GAAAGCTGTTGATTTTACTGG    |
|             | Hadha       | TCAATTAATGCCAGGGGAG     | GATACTAGTTACTTCCAGAC     |

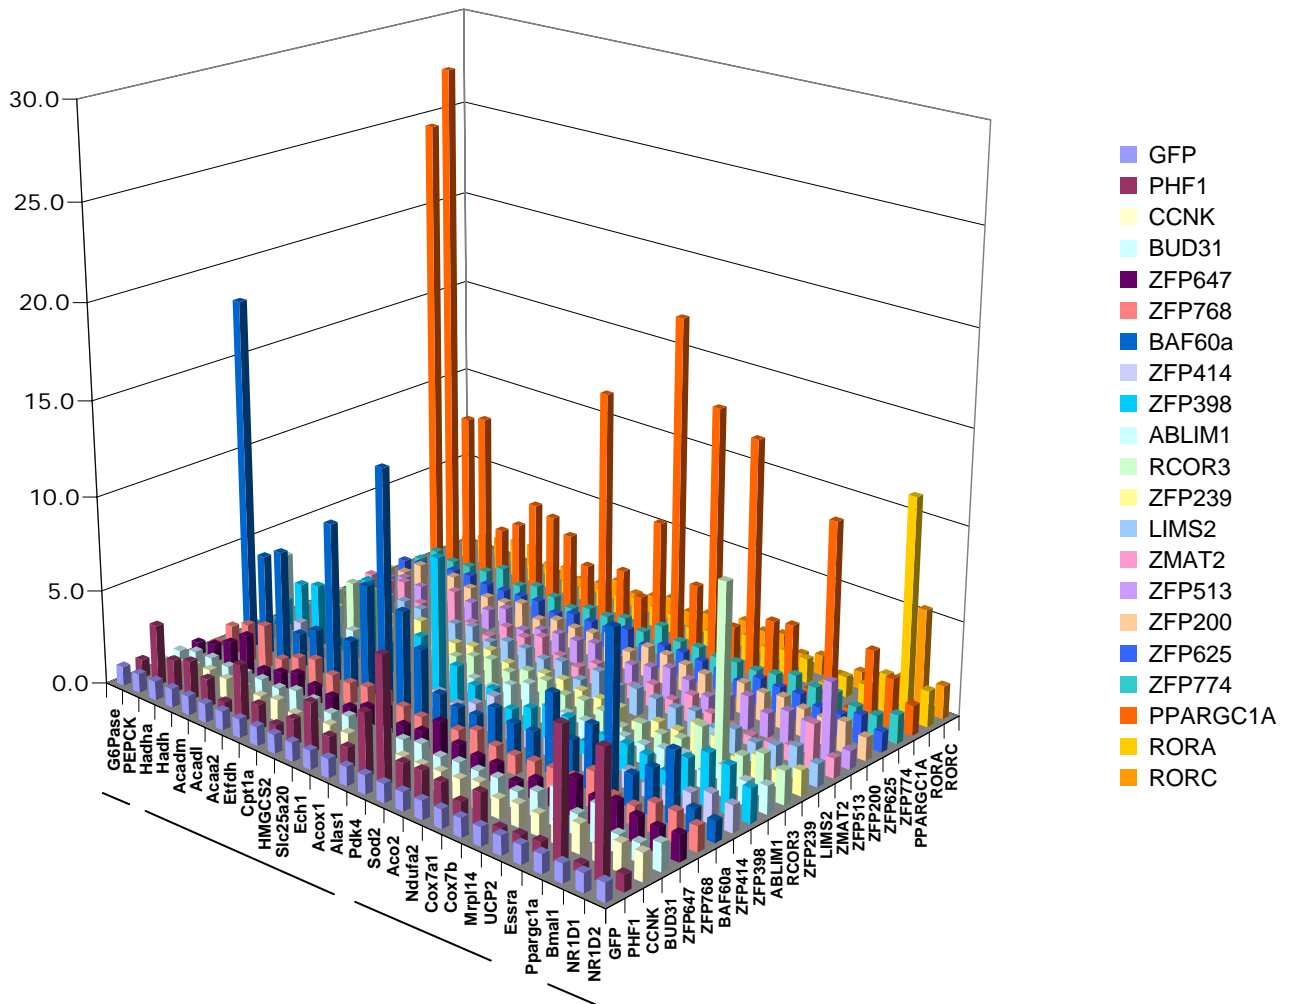

## Supplemental Figures

### Figure S1. Effects of Individual Factors on the Expression of PGC-1 $\alpha$ Target

#### Genes

qPCR analysis of mRNA expression in primary hepatocytes transduced with recombinant adenoviruses expressing GFP, PGC-1 $\alpha$  or individual PGC-1 $\alpha$  partners.

The expression of PGC-1 $\alpha$  target genes involved in hepatic gluconeogenesis, fatty acid  $\beta$ -oxidation, mitochondrial OXPHOS and circadian clock function were normalized to the GFP control. Note that BAF60a (blue bars) and PGC-1 $\alpha$  induce the expression of a common set of genes (orange bars).

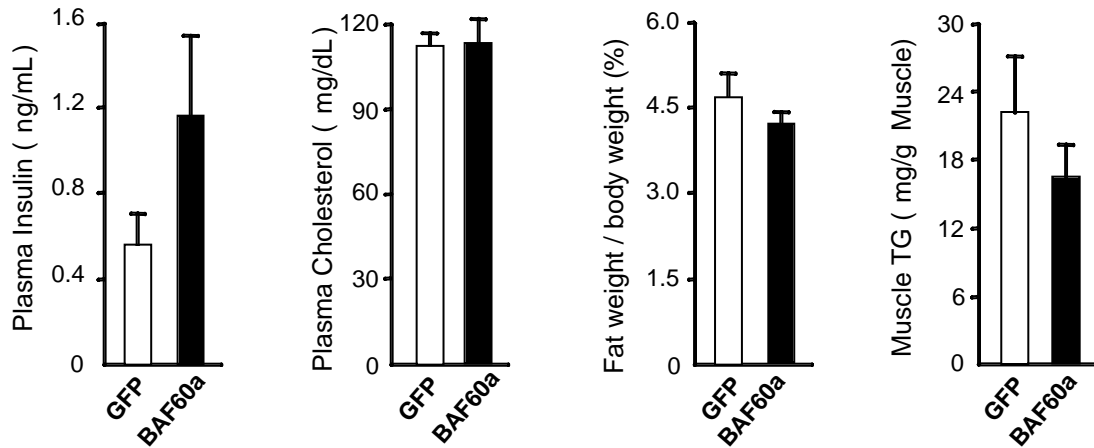

**Figure S2. Metabolic characteristics of mice transduced with GFP or BAF60a adenoviruses**

Plasma insulin and total cholesterol concentrations, percent gonadal fat weight, and muscle TG content in mice transduced with adenoviruses expressing GFP (open circle) or BAF60a (filled circle). Data represent mean  $\pm$  SEM, n=5. No statistical difference was observed between two groups.

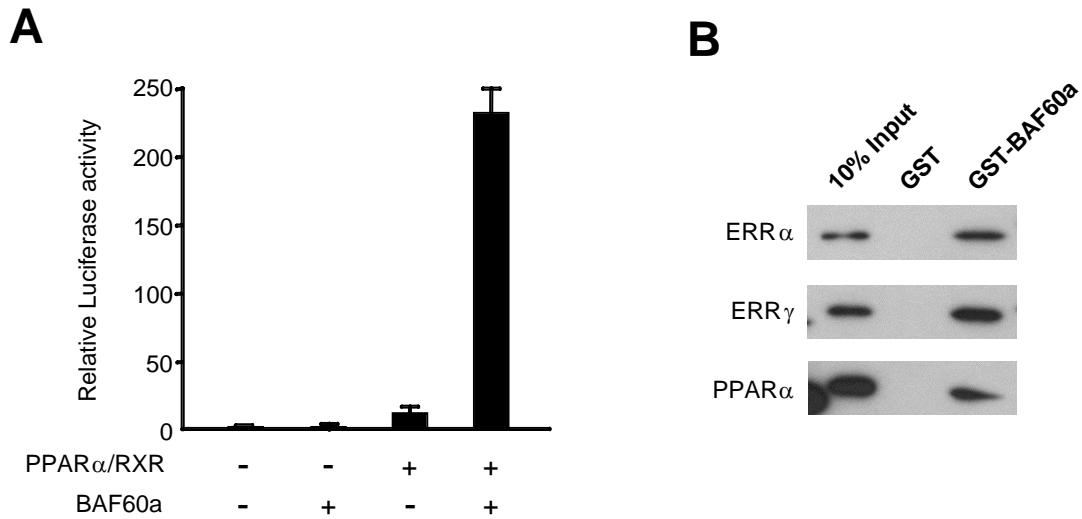

**Figure S3. Interaction of BAF60a with nuclear receptors**

(A) DR-1 luciferase reporter was transiently transfected into BOSC cells with PPAR $\alpha$ /RXR in the presence or absence of BAF60a. Data represent mean  $\pm$  stdev.

(B) Immunoblots of Flag-tagged ERR $\alpha$ , ERR $\gamma$  and PPAR $\alpha$ . GST and GST-BAF60a fusion proteins were incubated with *in vitro* transcribed and translated Flag-ERR $\alpha$ , Flag-ERR $\gamma$  or Flag-PPAR $\alpha$  followed by immunoblotting analysis using Flag antibody.

**A**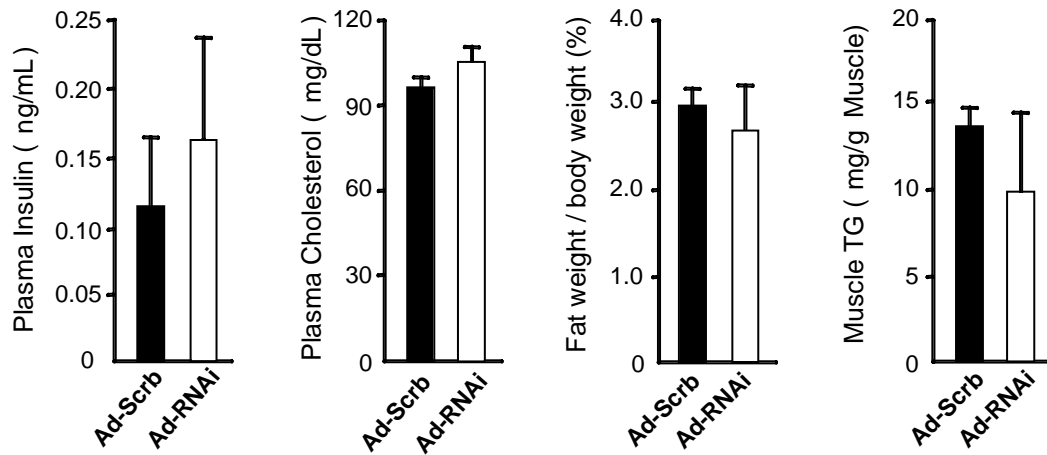**B**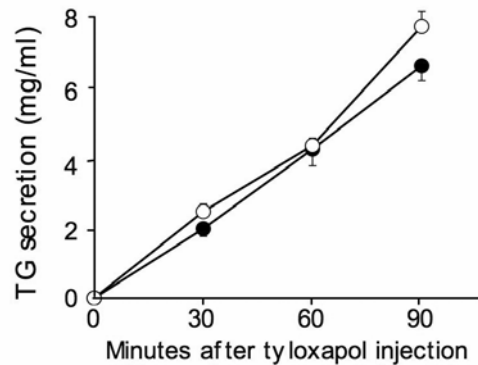

**Figure S4. Metabolic characteristics of mice transduced with control or BAF60a RNAi adenoviruses**

(A) Plasma insulin and total cholesterol concentrations, percent gonadal fat weight, and muscle TG content in mice transduced with control (filled) or BAF60a RNAi (open) adenoviruses.

(B) Increase in plasma TG following intravenous injection of tyloxapol (500 mg/kg) in mice transduced with control (filled) or BAF60a RNAi (open) adenoviruses. Data represent mean  $\pm$  SEM, n=5. No statistical difference was observed between two groups.
